# Supplementary material for: Socioeconomic deprivation worsens the outcomes of Italian women with hormone receptor-positive breast cancer and decreases the possibility of receiving standard care
Source: PubMed Central journal article supplement (PMC5620266; doi:10.18632/oncotarget.19447), 2017-07-22
Supplement: oncotarget-08-68402-s001.pdf [file oncotarget-08-68402-s001.pdf]

## Socioeconomic deprivation worsens the outcomes of Italian women with hormone receptor-positive breast cancer and decreases the possibility of receiving standard care

### SUPPLEMENTARY MATERIALS

Supplementary Table 1: Characteristics of 794 patients aged <50 years, by deprivation index<sup>a</sup>

|                         | Deprivation index tertile |            |              | Total      | p <sup>b</sup> |
|-------------------------|---------------------------|------------|--------------|------------|----------------|
|                         | 1 (least dep)             | 2          | 3 (most dep) |            |                |
| Area                    |                           |            |              |            |                |
| Centre-North            | 98 (35.3)                 | 92 (40.5)  | 116 (40.1)   | 306 (38.5) | 0.38           |
| South                   | 180 (64.8)                | 135 (59.5) | 173 (59.9)   | 488 (61.5) |                |
| Stage                   |                           |            |              |            |                |
| Early                   | 146 (52.5)                | 118 (52)   | 120 (41.5)   | 384 (48.4) | 0.02           |
| Advanced                | 114 (41)                  | 102 (44.9) | 154 (53.3)   | 370 (46.6) |                |
| unknown                 | 18 (6.5)                  | 7 (3.1)    | 15 (5.2)     | 40 (5)     |                |
| Hormone receptor status |                           |            |              |            |                |
| positive                | 172 (61.9)                | 148 (65.2) | 190 (65.7)   | 510 (64.2) | 0.58           |
| negative                | 49 (17.6)                 | 44 (19.4)  | 47 (16.3)    | 140 (17.6) |                |
| Other/unknown           | 57 (20.5)                 | 35 (15.4)  | 52 (18)      | 144 (18.1) |                |
| Grading                 |                           |            |              |            |                |
| Well different          | 26 (9.4)                  | 26 (11.5)  | 25 (8.7)     | 77 (9.7)   | 0.32           |
| Moderately different    | 109 (39.2)                | 94 (41.4)  | 115 (39.8)   | 318 (40.1) |                |
| Poorly differentiated   | 100 (36)                  | 81 (35.7)  | 121 (41.9)   | 302 (38)   |                |
| unknown                 | 43 (15.5)                 | 26 (11.5)  | 28 (9.7)     | 97 (12.2)  |                |
| Total                   | 228 (35)                  | 227 (28.6) | 289 (36.4)   | 794 (100)  |                |

<sup>a</sup>Classes were calculated by tertiles of resident population (at regional level, in 2001): 1=least deprived, 2=medium, 3=most deprived.

<sup>b</sup>Chi-square test for categorical variables.

Supplementary Table 2: Characteristics of 1,472 patients aged 50-70 years, by deprivation index<sup>a</sup>

|                         | Deprivation index tertile |            |              | Total       | p <sup>b</sup> |
|-------------------------|---------------------------|------------|--------------|-------------|----------------|
|                         | 1 (least dep)             | 2          | 3 (most dep) |             |                |
| Area                    |                           |            |              |             |                |
| Centre-North            | 231 (40.4)                | 205 (46.1) | 203 (44.6)   | 639 (43.4)  | 0.16           |
| South                   | 341 (59.6)                | 240 (53.9) | 252 (55.4)   | 833 (56.6)  |                |
| Stage                   |                           |            |              |             |                |
| Early                   | 284 (49.6)                | 250 (56.2) | 228 (50.1)   | 762 (51.8)  | 0.27           |
| Advanced                | 249 (43.5)                | 171 (38.4) | 198 (43.5)   | 618 (42.0)  |                |
| unknown                 | 39 (6.9)                  | 24 (5.4)   | 29 (6.4)     | 92 (6.2)    |                |
| Hormone receptor status |                           |            |              |             |                |
| positive                | 337 (58.9)                | 259 (58.2) | 296 (65.1)   | 892 (60.6)  | 0.23           |
| negative                | 98 (17.1)                 | 77 (17.3)  | 67 (14.7)    | 242 (16.4)  |                |
| Other/unknown           | 137 (24.0)                | 109 (24.5) | 92 (20.2)    | 338 (23.0)  |                |
| Grading                 |                           |            |              |             |                |
| Well different          | 58 (10.1)                 | 54 (12.1)  | 48 (10.6)    | 160 (10.9)  | 0.02           |
| Moderately different    | 241 (42.1)                | 205 (46.1) | 176 (38.7)   | 622 (42.3)  |                |
| Poorly differentiated   | 189 (33.1)                | 135 (30.3) | 184 (40.4)   | 508 (34.5)  |                |
| unknown                 | 84 (14.7)                 | 51 (11.5)  | 47 (10.3)    | 182 (12.4)  |                |
| Total                   | 572 (38.9)                | 445 (30.3) | 455 (30.9)   | 1,472 (100) |                |

<sup>a</sup>Classes were calculated by tertiles of resident population (at regional level, in 2001): 1=least deprived, 2=medium, 3=most deprived.

<sup>b</sup>Chi-square test for categorical variables.

Supplementary Table 3: Characteristics of 1,092 patients aged more than 70 year, by deprivation index<sup>a</sup>

|                         | Deprivation index tertile |            |              | Total       | p <sup>b</sup> |
|-------------------------|---------------------------|------------|--------------|-------------|----------------|
|                         | 1 (least dep)             | 2          | 3 (most dep) |             |                |
| Area                    |                           |            |              |             |                |
| Centre-North            | 187 (41.2)                | 138 (44.4) | 196 (60)     | 521 (47.7)  | <0.01          |
| South                   | 267 (58.8)                | 173 (55.6) | 131 (40)     | 571 (52.3)  |                |
| Stage                   |                           |            |              |             |                |
| Early                   | 163 (35.9)                | 109 (35.1) | 140 (42.8)   | 142 (37.7)  | 0.21           |
| Advanced                | 205 (45.2)                | 143 (46.0) | 126 (38.5)   | 474 (43.4)  |                |
| unknown                 | 86 (18.9)                 | 59 (18.9)  | 61 (18.7)    | 206 (18.9)  |                |
| Hormone receptor status |                           |            |              |             |                |
| positive                | 254 (56.0)                | 173 (55.6) | 195 (59.6)   | 622 (57.0)  | 0.74           |
| negative                | 69 (15.2)                 | 44 (14.2)  | 48 (14.7)    | 161 (14.7)  |                |
| Other/unknown           | 131 (28.8)                | 94 (30.2)  | 84 (25.7)    | 309 (28.3)  |                |
| Grading                 |                           |            |              |             |                |
| Well different          | 39 (8.9)                  | 27 (8.7)   | 31 (9.5)     | 97 (8.9)    | 0.65           |
| Moderately different    | 156 (34.4)                | 116 (37.3) | 121 (37.0)   | 393 (36.0)  |                |
| Poorly differentiated   | 146 (32.2)                | 101 (32.5) | 113 (34.6)   | 360 (32.9)  |                |
| unknown                 | 113 (24.9)                | 67 (21.5)  | 62 (18.9)    | 242 (22.2)  |                |
| Total                   | 454 (41.5)                | 311 (28.5) | 327 (30.0)   | 1,092 (100) |                |

<sup>a</sup>Classes were calculated by tertiles of resident population (at regional level, in 2001): 1=least deprived, 2=medium, 3=most deprived.

<sup>b</sup>Chi-square test for categorical variables.

Supplementary Table 4: Adjusted hazard ratios (HR) for relapse or metastasis, by age class

|                           | Age                   |           |                       |           |                       |           |
|---------------------------|-----------------------|-----------|-----------------------|-----------|-----------------------|-----------|
|                           | Model 2a <sup>a</sup> |           | Model 2b <sup>b</sup> |           | Model 2c <sup>c</sup> |           |
|                           | <50 years             |           | 50-70 years           |           | 70+ years             |           |
|                           | HR                    | 95% CI    | HR                    | 95% CI    | HR                    | 95% CI    |
| Deprivation index tertile |                       |           |                       |           |                       |           |
| 1 (least dep)             | 1                     |           | 1                     |           | 1                     |           |
| 2                         | 0.98                  | 0.61-1.58 | 1.11                  | 0.81-1.53 | 1.11                  | 0.75-1.64 |
| 3 (most dep)              | 1.26                  | 0.82-1.91 | 1.18                  | 0.87-1.61 | 1.16                  | 0.78-1.71 |
| Stage                     |                       |           |                       |           |                       |           |
| Early                     | 1                     |           | 1                     |           | 1                     |           |
| Late                      | 2.74                  | 1.84-4.09 | 3.57                  | 2.66-4.77 | 3.36                  | 2.25-5.01 |
| unknown                   | 1.21                  | 0.47-3.14 | 1.91                  | 1.04-3.50 | 1.55                  | 0.88-2.73 |
| Hormone receptor status   |                       |           |                       |           |                       |           |
| positive                  | 1                     |           | 1                     |           | 1                     |           |
| negative                  | 1.81                  | 1.16-2.83 | 2.62                  | 1.92-3.56 | 2.69                  | 1.81-4.01 |
| Other/<br>unknown         | 1.60                  | 1.03-2.51 | 1.38                  | 0.99-1.91 | 1.66                  | 1.11-2.47 |

<sup>a</sup>794 cases aged <50 years were selected for this model adjusted for stage and hormone-receptor subtype. <sup>b</sup>1472 cases aged 50-70 years were selected for this model adjusted for stage and hormone-receptor subtype. <sup>c</sup>1,092 cases aged 70+ years were selected for this model adjusted for stage and hormone-receptor subtype.
